# Supplementary material for: Invasion Consequences in Communities Maintained by Niche and Intransitive Coexistence Mechanisms
Source: MDPI journal article supplement (doi:10.3390/d15040554), 2023-04-13
Supplement: s1 [file s1]

Archive with 1 entries (1 files):
- diversity-2266732-supplementary.pdf
